# Supplementary material for: Effect of Age and Dietary Intervention on Discrimination Learning in Pet Dogs
Source: PubMed Central journal article supplement (PMC6246696; doi:10.3389/fpsyg.2018.02217), 2018-11-14
Supplement: Data_Sheet_1.pdf [file Data_Sheet_1.pdf]

## Supplementary material

### Subjects:

Table S1: Individual characteristics of dogs that participated in the final picture discrimination task in the touchscreen after one year of dietary intervention.

| No. | Name     | Age (yrs.) | Sex | Breed                 | Weight | Training score | Diet | Stimulus_group | Status                                             |
|-----|----------|------------|-----|-----------------------|--------|----------------|------|----------------|----------------------------------------------------|
| 1   | Fynn     | 7.3        | M   | Poodle                | 9.5    | 17             | test | GroupA         | Finished                                           |
| 2   | Apryl    | 7.5        | F   | Border Collie         | 18     | 14             | test | GroupA         | Finished                                           |
| 3   | Taiko    | 7.8        | M   | American Akita        | 33.7   | 12             | test | GroupA         | Finished                                           |
| 4   | Fenja    | 7.9        | F   | Mixed                 | 10     | 9              | test | GroupA         | Finished                                           |
| 5   | Kimba    | 8.2        | F   | Mixed                 | 25     | 0              | test | GroupA         | Finished                                           |
| 6   | Leila    | 8.4        | F   | Mixed                 | 20     | 22             | test | GroupA         |                                                    |
| 7   | Shane    | 8.1 0      | F   | Belgian shepherd      | 22     | 18             | test | GroupA         | Finished                                           |
| 8   | Forin    | 9.2        | F   | Border Collie         | 16     | 12             | test | GroupA         | Finished                                           |
| 9   | Nemo     | 9.3        | M   | Labrador              | 35.5   | 17             | test | GroupA         | Finished                                           |
| 10  | Guinness | 10.5       | F   | Border Collie         | 20     | NA             | test | GroupA         | Finished                                           |
| 11  | Nash     | 10.5       | M   | German Shepherd       | 34.2   | 23             | test | GroupA         | Finished                                           |
| 12  | Geena    | 11.2       | F   | Border Collie         | 19     | 17             | test | GroupA         | Finished                                           |
| 13  | Shadow   | 11.4       | M   | Mixed                 | 15.9   | 10             | test | GroupA         | Finished                                           |
| 14  | Wichtel  | 11.9       | M   | Pyrenean Shepherd     | 11     | 14             | test | GroupA         | Finished                                           |
| 15  | Jack     | 12.1       | M   | Mixed                 | 23.3   | 8              | test | GroupA         | Finished                                           |
| 16  | Enigma   | 12.5       | F   | Border Collie         | 20.3   | 18             | test | GroupA         | Finished                                           |
| 17  | Trisha   | 13.3       | F   | Border Collie         | 25     | 2              | test | GroupA         | Finished                                           |
| 18  | Bosco    | 14.4       | M   | Mixed                 | 32.4   | 0              | test | GroupA         | Did not finish but data used for correction trials |
| 19  | Flamme   | 7.1        | M   | Pyrenean Shepherd     | 18     | 31             | test | GroupB         | Finished                                           |
| 20  | Amadeus  | 7.2        | M   | Cavalier King Charles | 10     | 17             | test | GroupB         | Finished                                           |

| Spaniel |           |        |   |                          |      |    |         |        |                                                    |
|---------|-----------|--------|---|--------------------------|------|----|---------|--------|----------------------------------------------------|
| 21      | Marlo     | 7.6    | M | Australian Shepherd      | 25   | 27 | test    | GroupB | Finished                                           |
| 22      | Hybie     | 7.7    | F | Labrador                 | 28.3 | 0  | test    | GroupB | Finished                                           |
| 23      | Riga      | 8.6    | F | Entelbacher Mountain dog | 18   | 4  | test    | GroupB | Finished                                           |
| 24      | Akira1    | 8.7    |   | American staff           | 30   | 0  | test    | GroupB | Finished                                           |
| 25      | Frankie   | 8.8    | M | Golden Retriever         | 32.1 | 0  | test    | GroupB | Finished                                           |
| 26      | Scully    | 9.1    | F | Mixed                    | 28.7 | 8  | test    | GroupB | Finished                                           |
| 27      | Jacky     | 9.3    | M | Mixed                    | 13.5 | 11 | test    | GroupB | Finished                                           |
| 28      | Flora     | 9.1 0  | F | Golden Retriever         | 37.3 | 12 | test    | GroupB | Finished                                           |
| 29      | Bastian   | 10.1   | M | Border Collie            | 25   | 8  | test    | GroupB | Finished                                           |
| 30      | Quinnie   | 10.1   | F | Malinois                 | 28.7 | 28 | test    | GroupB | Finished                                           |
| 31      | Akita     | 10.2   | F | Mixed                    | 21   | 20 | test    | GroupB | Finished                                           |
| 32      | Ginger    | 10.4   | F | Parson Russel Terrier    | 10.1 | 19 | test    | GroupB | Finished                                           |
| 33      | Darwin    | 11     | M | Border Collie            | 23.2 | 15 | test    | GroupB | Did not finish but data used for correction trials |
| 34      | Flori     | 11.3   | F | Mixed                    | 17   | 28 | test    | GroupB | Finished                                           |
| 35      | Tilly     | 11.1 0 | F | Parson Russel Terrier    | 7    | 16 | test    | GroupB | Finished                                           |
| 36      | Ilvy      | 12.2   | F | Wolfspitz                | 20.3 | 13 | test    | GroupB | Finished                                           |
| 37      | Kora      | 13.1   | F | Mixed                    | 23   | 0  | test    | GroupB | Finished                                           |
| 38      | Sue       | 7.4    | F | Border Collie            | 19   | 13 | control | GroupA | Finished                                           |
| 39      | Leopold   | 7.7    | M | Mixed                    | 9    | 17 | control | GroupA | Finished                                           |
| 40      | Missface  | 8.2    | F | Mixed                    | 22   | 10 | control | GroupA | Finished                                           |
| 41      | Patrasch  | 8.4    | M | Mixed                    | 15   | 0  | control | GroupA | Finished                                           |
| 42      | Rocky_mix | 8.6    | M | Mixed                    | 17   | 2  | control | GroupA | Finished                                           |
| 43      | Cookie    | 9.2    | F | Mixed                    | 36   | 4  | control | GroupA | Finished                                           |
| 44      | Havanna   | 9.5    | F | Beagle                   | 10   | 8  | control | GroupA | Finished                                           |
| 45      | Ella      | 9.6    | F | Münsterländer            | 25   | 4  | control | GroupA | Finished                                           |
| 46      | Luke      | 9.7    | M | Border Collie            | 24.3 | 27 | control | GroupA | Finished                                           |
| 47      | Nora      | 9.7    | F | Mixed                    | 20   | 18 | control | GroupA | Finished                                           |
| 48      | Timi      | 9.1 0  | F | Magyar Vizsla            | 20   | 16 | control | GroupA | Finished                                           |

|           |           |      |   |                       |      |    |         |        |                                                        |
|-----------|-----------|------|---|-----------------------|------|----|---------|--------|--------------------------------------------------------|
| <b>49</b> | Sayzi     | 9.11 | M | Mixed                 | 0    | 17 | control | GroupA | Finished                                               |
| <b>50</b> | Ginger4   | 11.1 | F | Mixed                 | 9.1  | 10 | control | GroupA | Finished                                               |
| <b>51</b> | Isla      | 11.6 | F | Podenco               | 19   | 6  | control | GroupA | Finished                                               |
| <b>52</b> | Sunny     | 12.3 | M | Border Collie         | 20   | 15 | control | GroupA | Finished                                               |
| <b>53</b> | Todor     | 12.4 | M | Mixed                 | 15   | NA | control | GroupA | Finished                                               |
| <b>54</b> | Elvin     | 7.4  | M | Mixed                 | 9    | 0  | control | GroupB | Finished                                               |
| <b>55</b> | Elina     | 7.5  | F | Mixed                 | 18   | 3  | control | GroupB | Finished                                               |
| <b>56</b> | Gismo     | 7.7  | M | Border Collie         | 23.7 | 23 | control | GroupB | Finished                                               |
| <b>57</b> | Jersey    | 8.2  | F | Magyar Vizsla         | 22   | 10 | control | GroupB | Finished                                               |
| <b>58</b> | Tika      | 8.4  | F | Mixed                 | 28.8 | 18 | control | GroupB | Finished                                               |
| <b>59</b> | Nova      | 8.6  | F | Mixed                 | 22.4 | 16 | control | GroupB | Finished                                               |
| <b>60</b> | Socrates  | 9    | M | Mixed                 | 31.4 | 22 | control | GroupB |                                                        |
| <b>61</b> | Gwendolyn | 9.3  | F | White Swiss shepherd  | 34   | 12 | control | GroupB | Finished                                               |
| <b>62</b> | Chelsey   | 9.7  | F | Mixed                 | 42   | 0  | control | GroupB | Finished                                               |
| <b>63</b> | Queenie   | 9.8  | F | Beagle                | 13.1 | 4  | control | GroupB | Finished                                               |
| <b>64</b> | Ronja     | 9.8  | F | Parson Russel Terrier | 8    | 0  | control | GroupB | Finished                                               |
| <b>65</b> | Akira_mix | 9.11 | F | Mixed                 | 23   | 21 | control | GroupB | Finished                                               |
| <b>66</b> | Chil      | 9.11 | F | Australian Shepherd   | 16   | 27 | control | GroupB | Finished                                               |
| <b>67</b> | Sidney    | 10.2 | M | Border Collie         | 23   | 19 | control | GroupB | Finished                                               |
| <b>68</b> | Mago      | 10.4 | M | Golden Retriever      | 25.5 | 20 | control | GroupB | Finished                                               |
| <b>69</b> | Habibi    | 11.6 | F | Mixed                 | 16   | 0  | control | GroupB | Finished                                               |
| <b>70</b> | Poris     | 13.5 |   | Mixed                 | 9.5  | 4  | control | GroupB | Finished                                               |
| <b>71</b> | Kiwi      | 7.9  | F | Mudi                  | 10   | 0  | control | GroupB | Finished but data discarded due to feeding supplements |
| <b>72</b> | Haeger    | 11.4 | M | Australian Shepherd   | 22.4 | 30 | control | GroupA | Finished but data discarded due to feeding supplements |
| <b>73</b> | Mozart    | 10   | M | Golden Retriever      | 31.1 | 13 | test    | GroupB | Finished but data discarded                            |

|           |         |      |   |                     |      |    |         |        |                                                    |
|-----------|---------|------|---|---------------------|------|----|---------|--------|----------------------------------------------------|
|           |         |      |   |                     |      |    |         |        | due to feeding supplements                         |
| <b>74</b> | Rocky   | 8    | M | Labrador Retriever  | 29   | 12 | control |        | Did not finish but data used for correction trials |
| <b>75</b> | Porthos | 11.5 |   | Mixed               |      |    | control | GroupB | Did not finish but data used for correction trials |
| <b>76</b> | Chilli  | 12.4 | F | Herder              | 24   | 34 | control | GroupB | Did not finish                                     |
| <b>77</b> | Nanouk  | 7.6  | M | Australian Shepherd | 21.1 | 15 | control | GroupB | Did not finish but data used for correction trials |
| <b>78</b> | Toby    | 12.1 | M | Labrador Retriever  | 27   | 12 | control | GroupA | Did not finish but data used for correction trials |
| <b>79</b> | Fipsi   | 13.1 | M | Mixed               | 10.7 | 10 | control | GroupB | Did not finish                                     |

## Methodology:

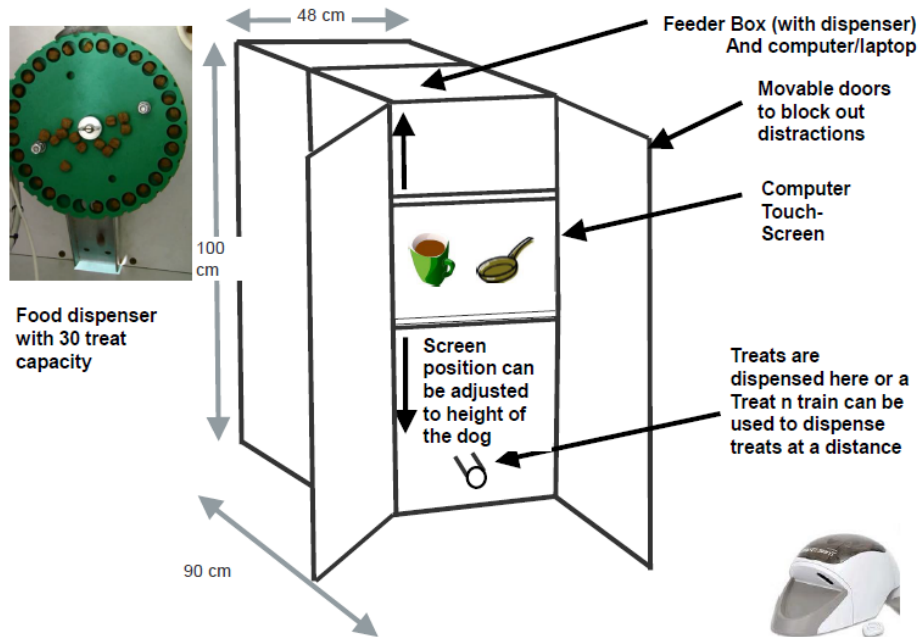

Figure S1. Schematic diagram of the touchscreen apparatus, including the feeder box (containing food dispenser and computer), movable doors to block out distractions and adjustable touchscreen monitor. Treats were dispensed through a tube from the feeder box, or through a feeding device (Treat & Train) to dispense treats at a distance. Top left: Photograph of the food dispenser inside the touchscreen apparatus. Bottom right: Treat & Train automatic food dispenser with remote control. This diagram is adapted from Wallis et al. (2017).

### 1. Phase 2: Discrimination pre-training (Geometric form discrimination or picture discrimination (1 vs 1))

Fourty five dogs (23 dogs on test diet and 22 dogs on control diet) participated in the geometric form discrimination. In this task, the dogs were shown a yellow triangle and a yellow arrow side by side on the screen of the touchscreen. Half of the dogs in each diet group were randomly allocated to Group ‘triangle’ and other half were allocated to Group ‘arrow’. Group ‘triangle’ was rewarded for touching the triangle; group ‘arrow’ was rewarded for touching the arrow.

Seventy dogs (35 dogs on each of two diets) participated in the picture discrimination training with two pictures (1 vs 1). In this task, the subjects were shown two clip art pictures side by side on the screen of touchscreen. The stimuli differed in colour, global outline, and internal features. This allowed the dog to more easily discriminate them. Half of the dogs in each diet group were randomly allocated to the Group ‘basket’ and the other half were allocated to Group ‘bowl’.

Group “basket” was rewarded for touching the basket; group ‘bowl’ was rewarded for touching the bowl. The presentation of the stimuli on the touchscreen, the training procedure and learning criteria were identical in both versions of the discrimination pre-training. Since the dogs only learned to touch one stimulus in the approach training, some dogs that found it difficult to learn this task were often helped verbally or in some occasions the experimenter pointed to the correct stimulus.

## **Results**

### ***Phase 2: Discrimination pre-training***

In the geometric form discrimination, 41 out of 45 dogs completed the training while 67 out of 70 dogs that participated in the picture discrimination task completed the training. Four dogs of the geometric form discrimination and 3 dogs presented with the picture discrimination task did not reach the criterion because of lack of motivation to work on the touchscreen.

In the geometric form discrimination, dogs on the test diet (n=19) took on average  $12.57 \pm 7.12$  sessions (range=4-28) to reach criterion, while dogs on the control diet (n=22) needed  $10.63 \pm 6.88$  sessions (range=4-26). In the 1x1 picture discrimination task, dogs on the test diet (n=32) took  $13.85 \pm 8.15$  sessions (range=4-40) to reach criterion, while dogs on the control diet (n=35) needed  $13.34 \pm 8.68$  sessions (range=4-36).

### ***Phase 3: Discrimination training (Phase 3: 4 vs. 4 and 2 vs. 2 discrimination)***

Of the 34 dogs that started with the 4 vs. 4 training, only 26 passed the learning criterion. When they started discrimination training, dogs in the test group (n=11) had been on diet for  $167.6 \pm 65.6$  days (mean  $\pm$  SD) whereas control dogs (n=15) for  $140.7 \pm 75.8$  days. Five dogs that did not pass the learning criterion exceeded one year of training period and therefore their training was stopped. Three other dogs dropped from the training because the owners terminated the training (n=2) and due to health problems (n=1). Of the 72 dogs that started with the 2 vs. 2 training, 61 dogs passed the criterion. When they started discrimination training, test dogs (n=31) had been on diet for  $88.7 \pm 98.1$  days whereas control dogs (n=30) for  $102.4 \pm 80.1$  days. Eleven dogs did not pass the learning criterion because their owners quitted the training (n=5) or they exceeded one year of training period (n=6).

Dogs trained on 4 vs. 4 stimuli took more sessions to reach the learning criterion ( $48.9 \pm 21.01$  sessions) compared to dogs trained on 2 vs. 2 stimuli ( $18.6 \pm 12.97$  sessions; estimate= 1.03, SE=0.13, Z= 7.53, p<0.001).

### ***Phase 4: Main discrimination task***

Among 79 dogs that participated in the main task, 71 dogs (n=36 dogs on test diet, n=35 control dogs) reached the learning criterion. However, 3 dogs had to be excluded from the analyses as their owners fed them with extra supplements shortly before and during the main discrimination

task. The 68 dogs included in the analyses needed 3 to 88 sessions to reach criterion. Eight dogs (test diet: 2 and control diet: 6) that did not reach the learning criterion participated in 82, 78, 55, 32, 27, 22, 8 and 3 sessions respectively.

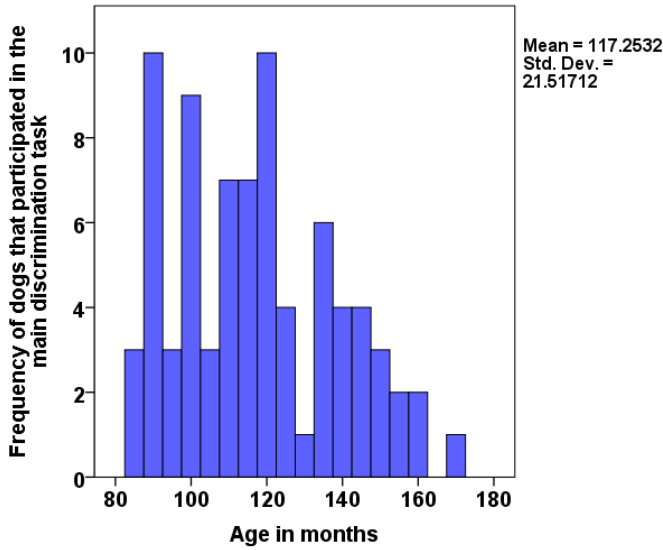

Fig. 2. Histogram showing the distribution of age in 79 dogs that participated in the main discrimination task.

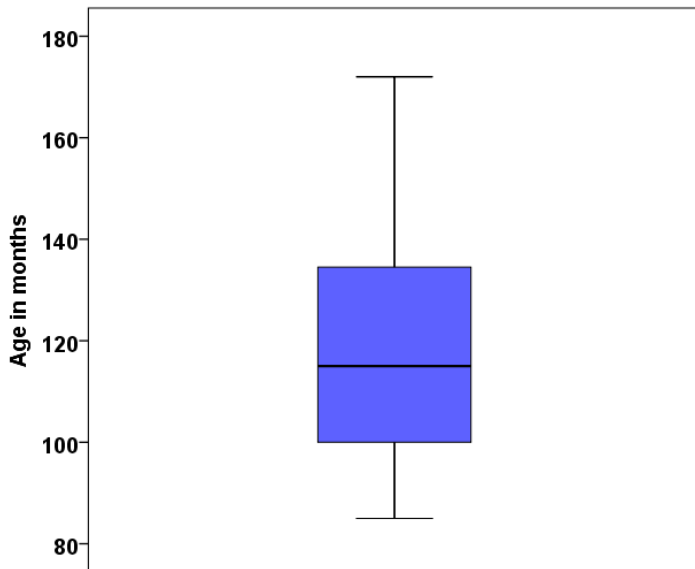

Fig. 2. Boxplot showing the distribution of age in 79 dogs that participated in the main discrimination task. The segment inside the rectangle shows the median age of subjects and the whisker above the box shows the maximum age of subjects and the whisker below the box shows the minimum age of subjects.

**References:**

Wallis, L. J., Range, F., Kubinyi, E., Chapagain, D., Serra, J., Huber, L. 2017. Utilising dog-computer interactions to provide mental stimulation in dogs especially during ageing. ACI2017. Proceedings of the Fourth International Conference on Animal-Computer Interaction Article No. 1. Doi >10.1145/3152130.3152146
